# Supplementary material for: Founder reconstruction enables scalable and seamless pangenomic analysis
Source: PubMed Central journal article supplement (PMC8665761; doi:10.1093/bioinformatics/btab516), 2021-07-14
Supplement: btab516_supplementary_data.pdf [file btab516_supplementary_data.pdf]

# Supplement: Founder Reconstruction Enables Scalable and Seamless Pangenomic Analysis

Tuukka Norri, Bastien Cazaux, Saska Dönges,  
Daniel Valenzuela, and Veli Mäkinen

May 2021

## 1 Additional experimental results

### 1.1 Experiments with artificial mutations

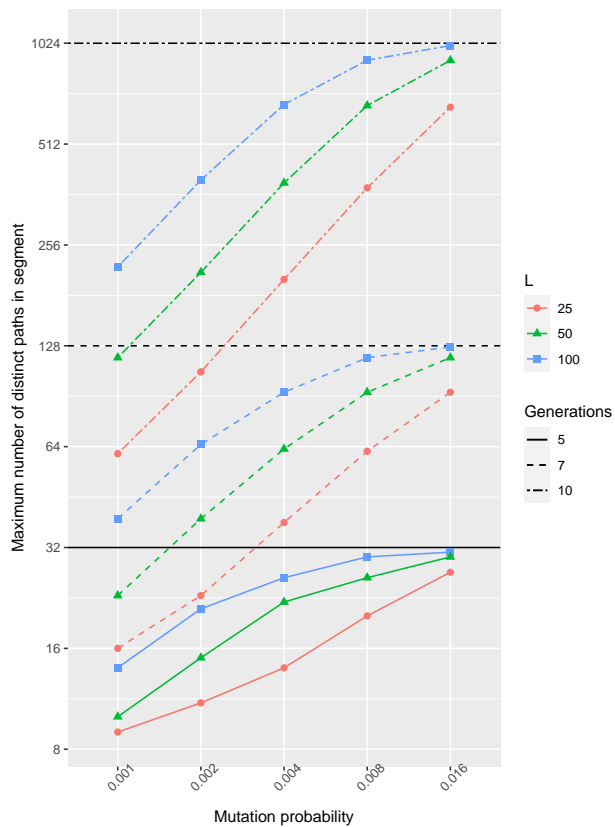

Supplemental Figure 1: Maximum number of distinct paths in one graph segment in index data for the artificial mutation experiment (smaller is better). Index data for all generations is shown. The number of samples in each case is shown with a horizontal line.

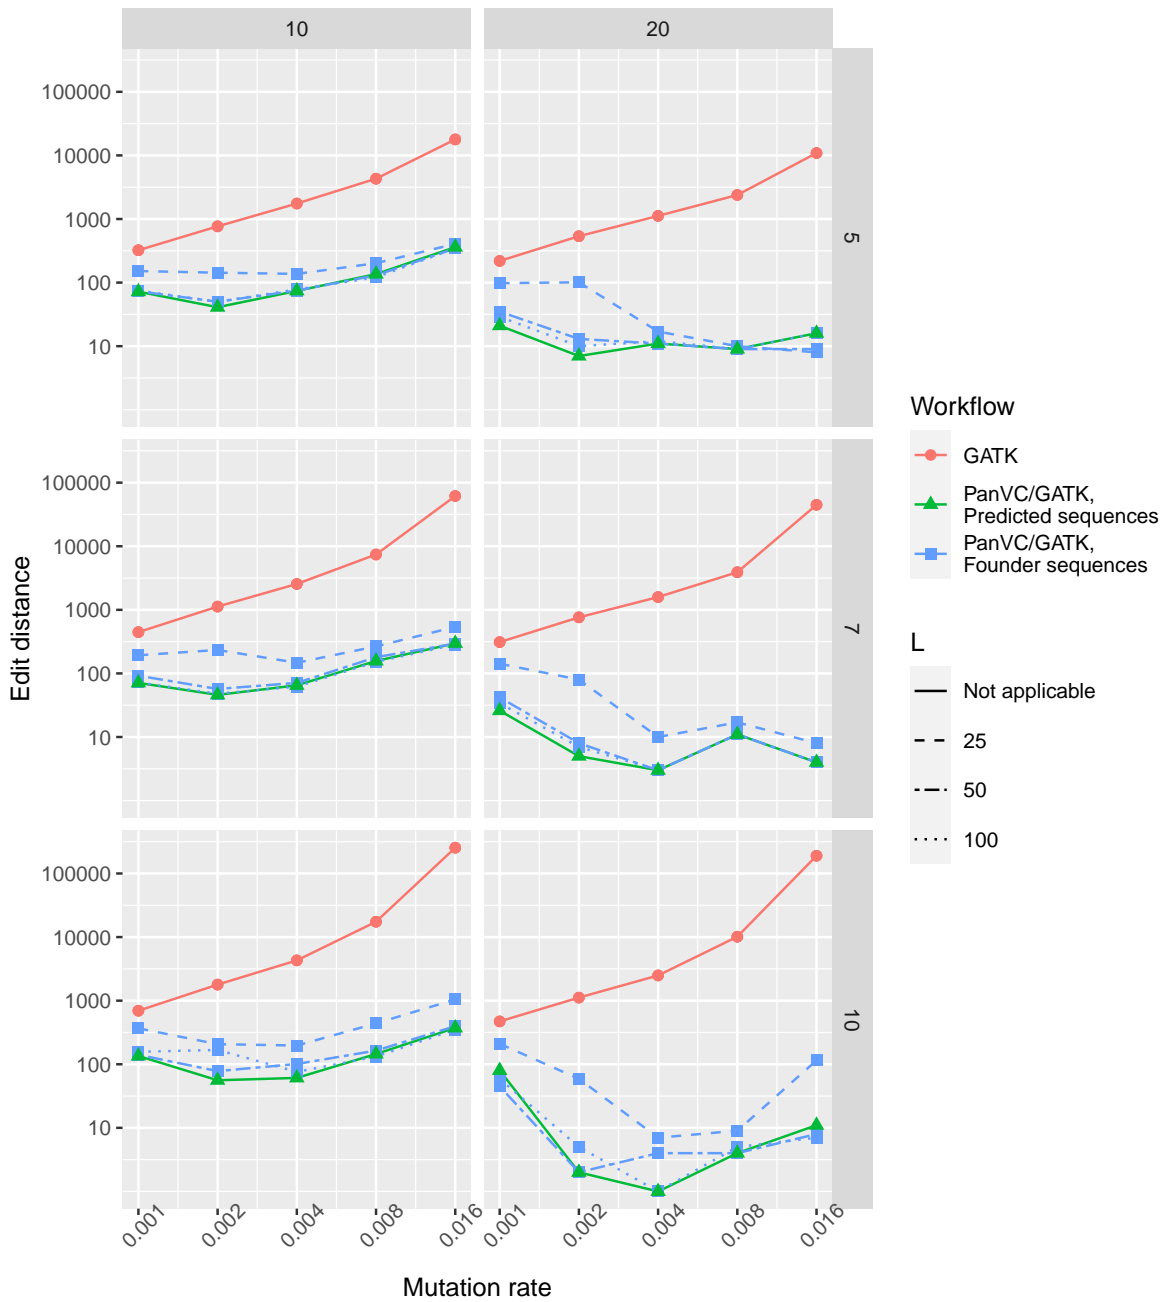

Supplemental Figure 2: Edit distances in the artificial mutation experiment when using GATK for variant calling. Founder sequences were generated with values 25, 50 and 100 for the parameter  $L$ . Read coverage is shown on the top of each column and generation number is shown on the right of each row. Results were similar to those with all of the predicted sequences when  $L$  was set to either 50 or 100.

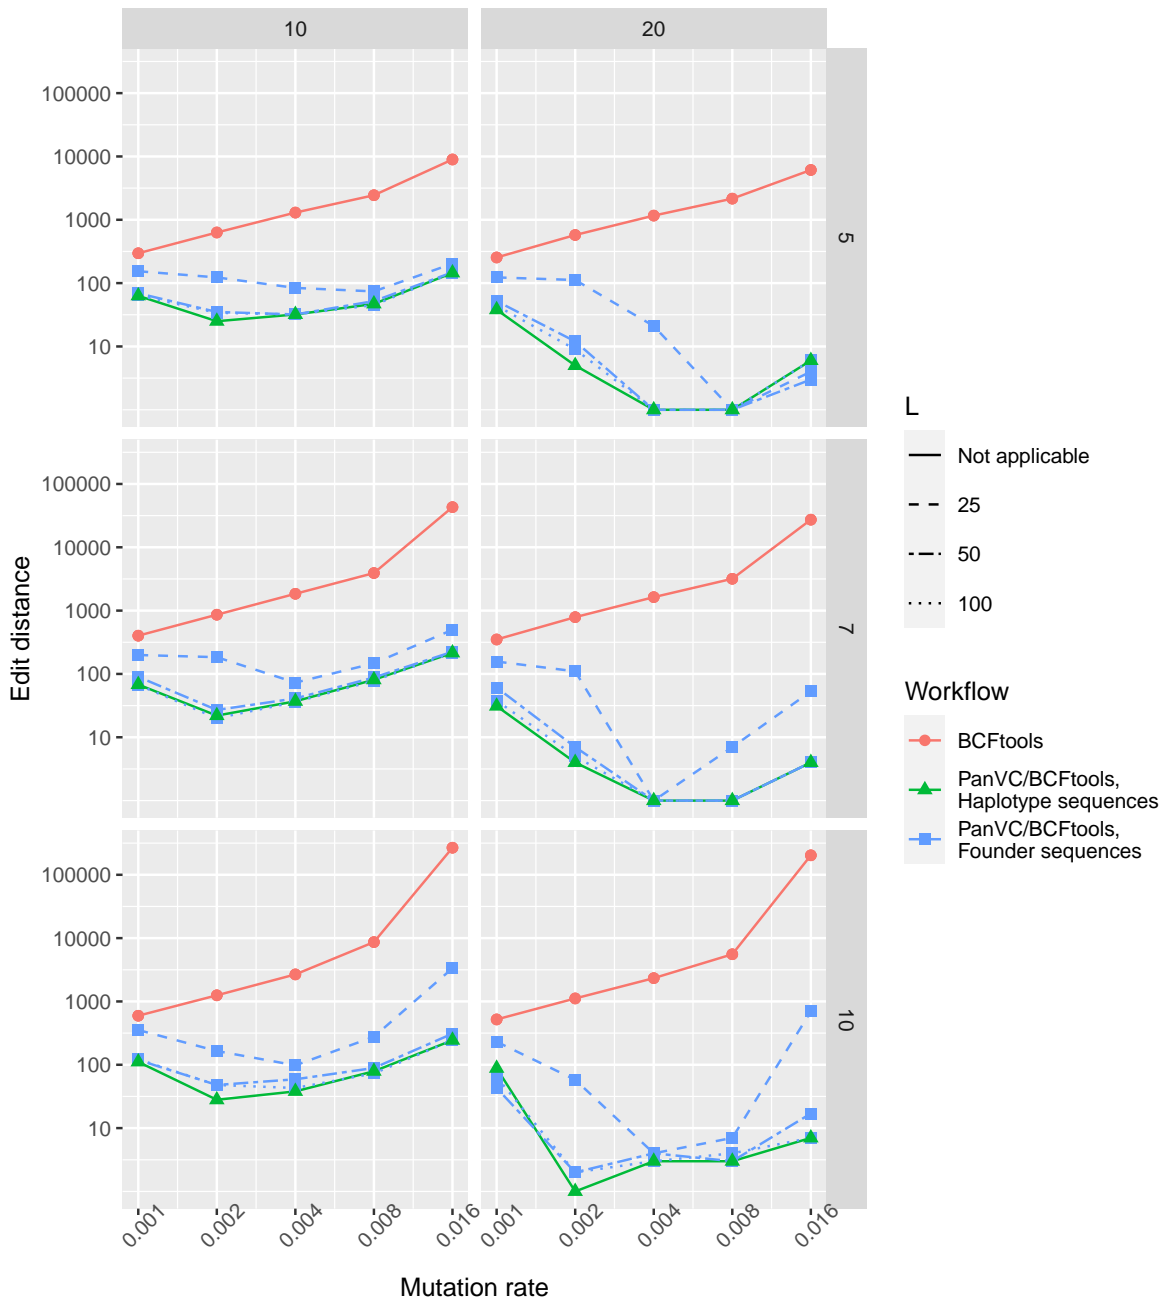

Supplemental Figure 3: Edit distances in the artificial mutation experiment when using BCFtools for variant calling. Founder sequences were generated with values 25, 50 and 100 for the parameter  $L$ . Read coverage is shown on the top of each column and generation number is shown on the right of each row. As with GATK, results were similar to those with all of the predicted sequences when  $L$  was set to either 50 or 100.

## 1.2 Experiments with natural E.coli samples

Supplemental Table 1: The strains of the reference sequences used in the experiment with natural E.coli samples. Strains used for the consensus sequence and for PanVC with haplotypes are shown in boldface.

| Organism Name                            | Strain                     | Sample              | Bioproject         |
|------------------------------------------|----------------------------|---------------------|--------------------|
| <b>E.coli str. K-12 substr. MG1655</b>   | <b>K-12 substr. MG1655</b> | <b>SAMN02604091</b> | <b>PRJNA225</b>    |
| E.coli O157:H7 str. Sakai                | Sakai substr. RIMD 0509952 | SAMN01911278        | PRJNA226           |
| E.coli DSM 30083 = JCM 1649 = ATCC 11775 | ATCC 11775                 | SAMN10252913        | PRJNA472652        |
| E.coli                                   | 97-3250                    | SAMN08638904        | PRJNA218110        |
| E.coli O157                              | 644-PT8                    | SAMN05007045        | PRJNA321984        |
| E.coli                                   | 2015C-4944                 | SAMN04482320        | PRJNA218110        |
| E.coli O26 str. RM10386                  | RM10386                    | SAMN08724660        | PRJNA69935         |
| E.coli O157:H7                           | FRIK944                    | SAMN04510563        | PRJNA322195        |
| E.coli                                   | MBT-5                      | SAMN15423745        | PRJNA643697        |
| <b>E.coli</b>                            | <b>FORC_028</b>            | <b>SAMN04026657</b> | <b>PRJNA294502</b> |
| E.coli O26:H11 str. 11368                | 11368                      | SAMD00060955        | PRJDA32509         |
| E.coli O26:H11                           | FWSEC0001                  | SAMN08768102        | PRJNA287560        |
| E.coli O145:NM                           | FWSEC0002                  | SAMN08768103        | PRJNA287560        |
| E.coli                                   | CFSAN027343                | SAMN10604454        | PRJNA230969        |
| <b>E.coli</b>                            | <b>2013C-4538</b>          | <b>SAMN08579598</b> | <b>PRJNA218110</b> |
| E.coli                                   | E2865                      | SAMD00129668        | PRJDB7170          |
| E.coli                                   | 2014C-3050                 | SAMN03569438        | PRJNA218110        |
| E.coli O26 str. RM8426                   | RM8426                     | SAMN08724651        | PRJNA69927         |
| <b>E.coli</b>                            | <b>2012C-4606</b>          | <b>SAMN04498549</b> | <b>PRJNA218110</b> |
| E.coli                                   | 2013C-4225                 | SAMN08579596        | PRJNA218110        |
| E.coli                                   | 2014C-3057                 | SAMN08579576        | PRJNA218110        |
| E.coli O157:H7                           | FRIK2455                   | SAMN04531998        | PRJNA322195        |
| E.coli O157:H7                           | FRIK2069                   | SAMN04191551        | PRJNA322195        |
| <b>E.coli O157:H7</b>                    | <b>FRIK2533</b>            | <b>SAMN04191553</b> | <b>PRJNA322195</b> |
| E.coli O157:H7                           | SS TX 313-1                | SAMN05360235        | PRJNA528413        |
| E.coli                                   | 2013C-3252                 | SAMN02991246        | PRJNA218110        |
| E.coli O103 str. RM8385                  | RM8385                     | SAMN08724650        | PRJNA69931         |
| E.coli                                   | RM13322                    | SAMN14449600        | PRJNA573729        |
| E.coli                                   | CAU16175                   | SAMN13705263        | PRJNA598281        |
| <b>E.coli O157:H7</b>                    | <b>BB24-1</b>              | <b>SAMN05360196</b> | <b>PRJNA528413</b> |

|                                     |                   |                     |                    |
|-------------------------------------|-------------------|---------------------|--------------------|
| E.coli O157:H7                      | NE 1092-2         | SAMN05360231        | PRJNA528413        |
| E.coli                              | 143               | SAMN08773050        | PRJNA445267        |
| <b>E.coli O157:H7</b>               | <b>pv15-279</b>   | <b>SAMD00108492</b> | <b>PRJDB6584</b>   |
| <b>E.coli</b>                       | <b>2014C-3051</b> | <b>SAMN08579564</b> | <b>PRJNA218110</b> |
| E.coli O157:H7                      | Show KS 470-1     | SAMN05360225        | PRJNA528413        |
| E.coli O157:H7                      | F6294             | SAMN11229489        | PRJNA528413        |
| E.coli                              | CFSAN027346       | SAMN10604455        | PRJNA230969        |
| E.coli O157:H7                      | TX 265-1          | SAMN05360242        | PRJNA528413        |
| <b>E.coli O145:H28 str. RM13514</b> | <b>RM13514</b>    | <b>SAMN02641383</b> | <b>PRJNA178648</b> |
| <b>E.coli O145:H28 str. RM12581</b> | <b>RM12581</b>    | <b>SAMN03081527</b> | <b>PRJNA178647</b> |
| <b>E.coli</b>                       | <b>2013C-3513</b> | <b>SAMN08579595</b> | <b>PRJNA218110</b> |
| <b>E.coli</b>                       | <b>ERL04-3476</b> | <b>SAMN10177961</b> | <b>PRJNA494713</b> |
| <b>E.coli O157:H7</b>               | <b>2571</b>       | <b>SAMN11229478</b> | <b>PRJNA528413</b> |
| <b>E.coli O157:H7 str. EC4115</b>   | <b>EC4115</b>     | <b>SAMN02603441</b> | <b>PRJNA27739</b>  |
| E.coli O157:H7                      | DEC5E             | SAMN11229486        | PRJNA528413        |
| E.coli                              | AUSMDU00014361    | SAMN11008224        | PRJNA556438        |
| E.coli O157:H7                      | F8798             | SAMN05360171        | PRJNA528413        |
| E.coli O157:H7                      | TR01              | SAMN10364854        | PRJNA503568        |
| E.coli O157:H7                      | ECP19-598         | SAMN16946946        | PRJNA681235        |
| E.coli                              | ATCC 43889        | SAMN01916927        | PRJNA321364        |
| <b>E.coli O157:H7</b>               | <b>G5295</b>      | <b>SAMN05360178</b> | <b>PRJNA528413</b> |
| E.coli                              | 28RC1             | SAMN04202540        | PRJNA299666        |
| E.coli                              | 150               | SAMN08773055        | PRJNA445267        |
| <b>E.coli O157</b>                  | <b>AR-0428</b>    | <b>SAMN12648978</b> | <b>PRJNA562719</b> |
| E.coli O157:H7                      | FRIK804           | SAMN10531264        | PRJNA508805        |
| E.coli                              | ERL05-1306        | SAMN10177963        | PRJNA494713        |
| E.coli                              | AUSMDU00002545    | SAMN13191633        | PRJNA556438        |
| E.coli O157:H7                      | 2-6-2             | SAMN05360202        | PRJNA528413        |
| E.coli O157                         | FDAARGOS_293      | SAMN06173306        | PRJNA231221        |
| <b>E.coli O157:H7 str. EDL933</b>   | <b>EDL933</b>     | <b>SAMN02905113</b> | <b>PRJNA253471</b> |
| E.coli                              | ERL06-2503        | SAMN10177966        | PRJNA494713        |
| E.coli O157:H7                      | SS TX 754-1       | SAMN05360237        | PRJNA528413        |
| E.coli O157:H7                      | YB14-1            | SAMN05360245        | PRJNA528413        |
| E.coli O157:H7                      | F7508             | SAMN05360163        | PRJNA528413        |
| E.coli                              | 2010C-3347        | SAMN04549845        | PRJNA218110        |
| E.coli O157:H7                      | 17B6-2            | SAMN05360191        | PRJNA528413        |
| E.coli                              | HB6               | SAMN11633027        | PRJNA530317        |

|                             |                   |                     |                    |
|-----------------------------|-------------------|---------------------|--------------------|
| E.coli                      | ECCNB12-2         | SAMN07723175        | PRJNA412707        |
| E.coli O45:H2               | FWSEC0003         | SAMN08768104        | PRJNA287560        |
| E.coli O157                 | AR-0427           | SAMN12648977        | PRJNA562719        |
| E.coli O157:H7              | F6321             | SAMN11229490        | PRJNA528413        |
| E.coli                      | 08-3914           | SAMN04504880        | PRJNA218110        |
| E.coli O157:H7 str. TW14359 | TW14359           | SAMN02604255        | PRJNA30045         |
| E.coli                      | PA20              | SAMN04040761        | PRJNA294158        |
| <b>E.coli O157:H7</b>       | <b>ECP19-2498</b> | <b>SAMN16946945</b> | <b>PRJNA681235</b> |
| E.coli O157:H7 str. SS17    | SS17              | SAMN02872945        | PRJNA200626        |
| E.coli O157:H7              | F1273             | SAMN11229487        | PRJNA528413        |
| E.coli O157:H7 str. F8092B  | F8092B            | SAMN02304041        | PRJNA528413        |
| E.coli O157:H7              | F7349             | SAMN05360158        | PRJNA528413        |
| E.coli                      | ERL06-2442        | SAMN10177964        | PRJNA494713        |
| E.coli O157:H7              | MB9-1             | SAMN05360217        | PRJNA528413        |
| E.coli                      | 9000              | SAMN05544760        | PRJNA336330        |
| E.coli O157:H7              | F6667             | SAMN05360149        | PRJNA528413        |
| E.coli                      | 472               | SAMN05544767        | PRJNA336330        |
| E.coli O157:H7              | NE 1169-1         | SAMN05360232        | PRJNA528413        |
| E.coli O157:H7              | NE1127            | SAMN11229496        | PRJNA528413        |
| E.coli                      | 155               | SAMN05544764        | PRJNA336330        |
| E.coli O157:H7              | F8492             | SAMN11267279        | PRJNA528413        |
| E.coli O157:H7              | LSU61             | SAMN11229493        | PRJNA528413        |
| E.coli                      | RM19259           | SAMN13429994        | PRJNA573729        |
| E.coli                      | 2013C-4187        | SAMN08579590        | PRJNA218110        |
| E.coli O157                 | 180-PT54          | SAMN05007044        | PRJNA321984        |
| E.coli                      | 112               | SAMN08773024        | PRJNA445267        |
| E.coli                      | 111               | SAMN08773023        | PRJNA445267        |
| <b>E.coli O157:H7</b>       | <b>MB41-1</b>     | <b>SAMN05360216</b> | <b>PRJNA528413</b> |
| E.coli                      | SRCC 1675         | SAMN04202539        | PRJNA299765        |
| E.coli                      | 144               | SAMN08773051        | PRJNA445267        |
| E.coli O157:H7              | N8B7-2            | SAMN05360221        | PRJNA528413        |
| E.coli                      | ERL06-2497        | SAMN10177965        | PRJNA494713        |
| <b>E.coli</b>               | <b>NZRM4169</b>   | <b>SAMN10177969</b> | <b>PRJNA494713</b> |

Supplemental Table 2: The identifiers of the samples used in the first part of the experiment with natural *E.coli* samples. All data were part of bioproject PRJNA218110 and study SRP046387.

| Experiment  | Sample       | Run         |
|-------------|--------------|-------------|
| SRX6770193  | SAMN12657222 | SRR10035010 |
| SRX7011058  | SAMN13047823 | SRR10298294 |
| SRX7435075  | SAMN13897143 | SRR10760848 |
| SRX8086834  | SAMN14568886 | SRR11515223 |
| SRX8086386  | SAMN14566463 | SRR11514775 |
| SRX9364727  | SAMN16555685 | SRR12899680 |
| SRX10070724 | SAMN17861353 | SRR13681366 |
| SRX10990244 | SAMN19336591 | SRR14651731 |
| SRX2194368  | SAMN05788720 | SRR4299818  |
| SRX2662962  | SAMN06624388 | SRR5367694  |
| SRX3058572  | SAMN07429387 | SRR5892897  |
| SRX3349343  | SAMN07662592 | SRR6241970  |
| SRX3770854  | SAMN08646861 | SRR6813864  |
| SRX4175059  | SAMN09375722 | SRR7271452  |
| SRX4518650  | SAMN09779958 | SRR7656265  |
| SRX4745878  | SAMN10139043 | SRR7909757  |
| SRX5074318  | SAMN10492716 | SRR8256810  |
| SRX5554100  | SAMN11192045 | SRR8763187  |
| SRX5796702  | SAMN11582321 | SRR9018582  |
| SRX6453210  | SAMN12287265 | SRR9694889  |

Supplemental Table 3: The identifiers of the samples used in the second part of the experiment with natural *E.coli* samples. All data were part of bioproject PRJNA218110 and study SRP046387.

| Experiment | Sample       | Run         | Strain      |
|------------|--------------|-------------|-------------|
| SRX7116262 | SAMN13242703 | SRR10418234 | 2016AM-1919 |
| SRX7116264 | SAMN13242707 | SRR10418236 | 2016AM-0680 |
| SRX7116266 | SAMN13242725 | SRR10418238 | 2016AM-0781 |
| SRX7116271 | SAMN13242726 | SRR10418243 | 2016AM-0587 |
| SRX7116302 | SAMN13242766 | SRR10418274 | 2016AM-0812 |
